# Supplementary material
Source: PubMed Central journal article supplement (PMC5590727)
Supplement: NIHMS73274-supplement-Supplementary_information.pdf [file NIHMS73274-supplement-Supplementary_information.pdf]

## **Legends to Supplementary Videos**

### **Video S1. Asymmetric cell movements during heart looping in zebrafish**

*Tg(tbx5a:eGFP)* line shows both the heart tube and late cardiac progenitors contributing to the posterior pole. Embryos were microinjected with Control MO at 1 cell stage and the time-lapse 4D videos were recorded from 28 hpf to 44 hpf taking one picture every 10 minutes. The video shows a ventral view (right side on the left) of surface rendering of a maximum intensity projection. Note the bilaterally asymmetric cell contribution, with more cells from the right side.

### **Video S2. *prrx1a* knockdown prevents heart looping in zebrafish**

*Tg(tbx5a:eGFP)* embryos were microinjected with *prrx1a*<sup>MO1</sup> at 1 cell stage and the time lapse 4D videos were recorded from 28 hpf to 44 hpf stage taking one picture every 10 minutes. The video shows images similar to those described in legend to Video S1. Note the decrease in the Tbx5a+ progenitor cells and the absence of heart looping.

### **Video S3. Down regulation of *prrx1a* produces randomized heart jogging**

*Tg(tbx5a:eGFP)* embryos were microinjected with *prrx1a*<sup>MO1</sup> at 1 cell stage and the time lapse 4D videos were recorded from 27hpf to 48hpf taking one picture every 10 minutes. The video shows a maximum intensity projection of confocal images. While the jogging is to the left side as in control embryos the heart fails to loop and remains as a straight tube in the midline.

### **Video S4. Down regulation of *prrx1a* produces randomized heart jogging**

*Tg(tbx5a:eGFP)* embryos were microinjected with *prrx1a*<sup>MO1</sup> at 1 cell stage and the time lapse 4D videos were recorded from 27hpf to 48hpf taking one picture every 10 minutes. The video shows a maximum intensity projection of confocal images. While the jogging is to the right side the heart fails to loop and remains as an straight tube in the midline.

**Video S5. Asymmetric actomyosin forces during heart looping in zebrafish**

*Tg(tbx5a:eGFP)* embryos were microinjected with Control MO plus LifeAct:*RFP* mRNA at 1 cell-stage and the time-lapse 4D videos were recorded from 28hpf to 38hpf stage taking one picture every 10 minutes. The video shows ventral views (right side on the left) of a maximum intensity projection and was generated with a colocalization channel. Note how actomyosin fibres make contact at the posterior pole of the heart on the right side.

**Video S6. Prrx1a drives the asymmetric actomyosin forces necessary for the heart looping in zebrafish**

*Tg(tbx5a:eGFP)* embryos were microinjected with *prrx1a*<sup>MO1</sup> plus LifeAct:*RFP* mRNA at 1 cell-stage and the time-lapse 4D videos were recorded and presented as described in Video S5. Note the disruption of actomyosin fibres and the absence of the cable-like structure upon *prrx1a* downregulation.

**Video S7. *prrx1a* regulates cell shape and actomyosin cytoskeleton-Control.**

3D reconstruction at 30-32 hpf in a *Tg(actb2:myl12.1-mCherry)* zebrafish embryo injected with LifeAct:*GFP* mRNA and control morpholino (Ctrl MO) at 1 cell-stage embryo to visualize F-actin (lifeAct:*GFP*, green), myosin II (*myl12.1 mCherry*, red) and Prrx1 expression (anti-Prrx1, white).

**Video S8. *prrx1a* regulates cell shape and actomyosin cytoskeleton-*prrx1a*<sup>MO1</sup>.**

3D reconstruction at 30-32 hpf in a *Tg(actb2:myl12.1-mCherry)* zebrafish embryo injected with LifeAct:*GFP* mRNA and *prrx1a* morpholino (*prrx1a*<sup>MO1</sup>) at 1 cell-stage embryo to visualize, F-actin (lifeAct:*GFP*, green), myosin II (*myl12.1-mCherry*, red) and Prrx1 expression (anti-Prrx1, white).

**Video S9. Heart looping in zebrafish-control**

*Tg(tbx5a:eGFP)* embryos were treated with vehicle from 26hpf and the time lapse 4D videos were recorded from 26hpf to 44hpf stage taking one picture every 10 minutes. The video shows a maximum intensity projection. Note the proper dextral looping of the heart.

**Video S10. Actomyosin inhibition prevents heart looping in zebrafish**

*Tg(tbx5a:eGFP)* embryos were treated with blebbistatin from 26hpf and the time lapse 4D videos were recorded and presented as described for Video S9. Note how upon blebbistatin treatment the dextral looping of the heart is impeded and the heart remains as a straight tube.

**Supplementary Table I. Antibodies used in this work. Source and dilution**

| <b>Primary Antibodies</b>         | <b>Source</b>            | <b>Catalog Number</b> | <b>Dilution</b> |
|-----------------------------------|--------------------------|-----------------------|-----------------|
| Anti-GFP-chicken                  | Aveslab                  | GFP-1020              | 1/500           |
| Anti-RFP-mouse                    | Life technologies        | MA515257              | 1/500           |
| Phalloidin-TRITC                  | Sigma                    | P1951                 | 1/50            |
| Phalloidin-FITC                   | Sigma                    | P5282                 | 1/50            |
| Anti-Prrx1-rabbit                 | Tanaka lab               | -                     | 1/200           |
| Anti-S46-mouse                    | Hybridoma bank           | -                     | 1/250           |
| Anti-MF-20-mouse                  | Hybridoma bank           | -                     | 1/250           |
| Anti-Islet1-mouse                 | Hybridoma bank           | 40.2D6                | 1/500           |
| Anti-Palladin-mouse               | Thermo Fisher Scientific | MA5-16141             | 1/50            |
| Anti-Fluorescein-POD              | Roche                    | 11 426 320 001        | 1/500           |
| Anti-Histone3                     | Abcam                    | AB1791                | 1/250           |
| Anti-Smad 5-rabbit                | Cell Signaling           | 12534                 | 1/100           |
| Anti-IgG- rabbit                  | Diagenode                | C15410206             | 1/500           |
| <b>Secondary Antibodies</b>       | <b>Source</b>            | <b>Catalog Number</b> | <b>Dilution</b> |
| Alexa Fluor 488 goat anti-chicken | Life technologies        | A11039                | 1/500           |
| Alexa Fluor 488 goat anti-mouse   | Invitrogen               | A11001                | 1/500           |
| Alexa Fluor 488 goat anti-rabbit  | Invitrogen               | A11008                | 1/500           |
| Alexa Fluor 568 goat anti-mouse   | Invitrogen               | A11004                | 1/500           |
| Alexa Fluor 568 goat anti-rabbit  | Invitrogen               | A11011                | 1/500           |
| Alexa Fluor 647 goat anti-rabbit  | Life technologies        | A27040                | 1/500           |
| Alexa Fluor 647 goat anti-mouse   | Life technologies        | A31571                | 1/500           |

**Supplementary Table II. Oligonucleotides used in this work**

| <b>Name</b>                  | <b>Sequence 5'-3'</b>     | <b>Type</b>   |
|------------------------------|---------------------------|---------------|
| <i>prrx1a</i> <sup>MO1</sup> | TTTTGTTCTCCAGCACTTACTCTCC | Morpholino    |
| <i>prrx1a</i> <sup>MO2</sup> | ATATCCTCTACCTACAACCAACATG | Morpholino    |
| <i>spaw</i> <sup>MO</sup>    | TGGTAGAGCTTCAACAGACTCTGCA | Morpholino    |
| <i>snail1b</i> <sup>MO</sup> | CTCTTAATTTCACTCTCACCAGTCT | Morpholino    |
| <i>Snail1bF</i>              | ATGCCACGCTCATTCTTGT       | RT-PCR        |
| <i>Snail1bR</i>              | GCGGGACGACTGCATATC        | RT-PCR        |
| <i>Snail1</i> <sup>MO1</sup> | CCAGCACTGTAGGCAACAGGCAGCA | Morpholino    |
| <i>Snail1</i> <sup>MO2</sup> | GCCAAGTAGCGTCATTACCAGTGTG | Morpholino    |
| <i>gSnai1PF1</i>             | GCAAGAAGCCCAACTACAGC      | RT-PCR        |
| <i>gSnail1PR1</i>            | TGCCCTCATCCTCCTCACTA      | RT-PCR        |
| <i>gSnail1PF2</i>            | CCCTGTGTCTGCAAGATGTG      | RT-PCR        |
| <i>gSnail1PR2</i>            | ATGTATCTGCACGGGAAAGG      | RT-PCR        |
| <i>zfgapdh-F</i>             | GTACGACTCCACCCATGGAA      | RT-PCR        |
| <i>zfgapdh-R</i>             | CCTGCATCACCCCACTTAAT      | RT-PCR        |
| <i>siRNA1-Prrx1</i>          | UUGGCUUGUAAAUUGUCCAGGCCGG | siRNA         |
| <i>siRNA2-Prrx1</i>          | GGACAAUGAUCAGCUGAAUUCAGAA | siRNA         |
| <i>gPcA13F</i>               | TAGGAGCCACACTACCAAACCGAC  | sgRNA cloning |
| <i>gPcA13R</i>               | AAACGTCGGTTTTGGTAGTGTGGCT | sgRNA cloning |
| <i>gPcT21F</i>               | TAGGACTGCGATCACCGCAATC    | sgRNA cloning |
| <i>gPcT21R</i>               | AAACGATTCGCGTTGATCGCAGT   | sgRNA cloning |
| <i>zfmyl7</i>                | AGGGGGAAAACCTGCTCAAAG     | Probe cloning |
| <i>zfmyl7</i>                | GGCCTTAAACCAAATGTCCA      | Probe cloning |
| <i>zfamhc F</i>              | TCAACTGGATGGTGGTGAGA      | Probe cloning |
| <i>zfamhc R</i>              | CTCTTGAAGCAACGACACCA      | Probe cloning |
| <i>zfvmhc F</i>              | GCTCCTCCTTCCAGACTGTG      | Probe cloning |
| <i>zfvmhc R</i>              | CTGCTGCTTGTCATTTCCA       | Probe cloning |
| <i>caMHC F</i>               | ACTGGATGCTGAGACACGAA      | Probe cloning |
| <i>caMHC R</i>               | TCAGAGATTGGGGCTGGAAG      | Probe cloning |
| <i>cvMHC F</i>               | TGCAGTCCACCCTTGATTCT      | Probe cloning |
| <i>cvMHC R</i>               | TCCCTTGACTTGCTCCTCAG      | Probe cloning |
| <i>cPald F</i>               | TGATGGAACCTTGCTCACTGC     | Probe cloning |
| <i>cPald R</i>               | GCTTGGTTGTTTGAGGTGGT      | Probe cloning |
| <i>cPrrx2 F</i>              | GGAAAACTTCAGCGTGAGC       | Probe cloning |
| <i>cPrrx2 R</i>              | ACCCAAATTGGTCAAATCCA      | Probe cloning |
| <i>cTbx18 F</i>              | AGGGGATGAGTGTAGGGTCT      | Probe cloning |
| <i>cTbx18 R</i>              | CTTCTTGGAGCGTTCGGATG      | Probe cloning |
| <i>cTbx5 F</i>               | GTGGGGACGGAGATGATCAT      | Probe cloning |
| <i>cTbx5 R</i>               | GAGCTGGCGTACATACATGC      | Probe cloning |
| <i>cNkx2.5 F</i>             | CATGTTGGCCACCTTCAAGC      | Probe cloning |
| <i>cNkx2.5 R</i>             | ATGAGTTGTAGGGCTTGGCT      | Probe cloning |
| <i>MmPrrx1 F</i>             | GACCATGACCTCCAGCTACGG     | Probe cloning |
| <i>MmPrrx1 R</i>             | TCAGTTGACTGTTGGCACCT      | Probe cloning |
| <i>MmPrrx2 F</i>             | GCAAGAACTTCTCGGTGAGC      | Probe cloning |
| <i>MmPrrx2 R</i>             | GCCTTAGGCACAATCTCAGC      | Probe cloning |
| <i>GgRS17F</i>               | ACACCCGTCTGGGCAACGACT     | qRT-PCR       |
| <i>GgRS17R</i>               | CCCGCTGGATGCGCTTCATCA     | qRT-PCR       |
| <i>GgPrrx1F</i>              | CACTACCCCGATGCCTTTGTA     | qRT-PCR       |
| <i>GgPrrx1 R</i>             | GAAACTTGGCTCTCCGGTTCT     | qRT-PCR       |
| <i>GgPalladin F</i>          | GCAGCGCACAACCTAAGTGC      | qRT-PCR       |
| <i>GgPalladin R</i>          | TGGGAAATGGTGGAAATCAT      | qRT-PCR       |
| <i>MmEef2 F</i>              | AGCGAGGACAAAGACAAGGA      | qRT-PCR       |

|                     |                                                                    |                   |
|---------------------|--------------------------------------------------------------------|-------------------|
| <b>MmEef2 R</b>     | TACTTCTGTGCAGTGACGGG                                               | qRT-PCR           |
| <b>MmSnail1 F</b>   | CAGCTGCTTCGAGCCATAGA                                               | qRT-PCR           |
| <b>MmSnail1 R</b>   | TAGGGGAGGTAGGGAAGTGG                                               | qRT-PCR           |
| <b>MmPalladin F</b> | GTCGCGTCAGTTGTACAGGA                                               | qRT-PCR           |
| <b>MmPalladin R</b> | CACTGTCCCCTGATCGAGAG                                               | qRT-PCR           |
| <b>DrEF1α F</b>     | GTCAAGGACATCCGTCGTG                                                | qRT-PCR           |
| <b>DrEF1α R</b>     | ACCAGGGTGGTTCAGGATG                                                | qRT-PCR           |
| <b>Drprrx1a F</b>   | AGTCTCCGGGACTCACCAG                                                | qRT-PCR           |
| <b>Drprrx1a R</b>   | TCTCCTCTGCGTTGAGCTG                                                | qRT-PCR           |
| <b>QPCR-DF</b>      | TTAAATGCATGGAGAGGCTCG                                              | QPCR-ChIP         |
| <b>QPCR-DR</b>      | ACCGGGCCCCCTAAGAC                                                  | QPCR-ChIP         |
| <b>QPCR-PF</b>      | CCCTAGCAGCTCTCCGTTGG                                               | QPCR-ChIP         |
| <b>QPCR-PR</b>      | CTCTCCATGGCGTGGGCATA                                               | QPCR-ChIP         |
| <b>QPCR-CRF</b>     | GCATCATCAGGCCATTCCGT                                               | QPCR-ChIP         |
| <b>QPCR-CRR</b>     | CCCAAGAGTTTGGTGACCCTA                                              | QPCR-ChIP         |
| <b>GgDF</b>         | TGCTCCCTTATATTAATACCCATC                                           | Gg Distal Cloning |
| <b>GgDR</b>         | GCAAAGGAGACTGAAAGACAGG                                             | Gg Distal Cloning |
| <b>GgPF</b>         | CCTCTCTCTCCCCTCCGG                                                 | Gg Prox. Cloning  |
| <b>GgPR</b>         | GCAGGTGACTCACGGAAAAG                                               | Gg Prox. Cloning  |
| <b>Distal Mut F</b> | gctcggggaagcacatctgtttcaatcGAATTCActttgatggcatcaaat<br>gttctttcccc | Mutagenesis       |
| <b>Distal Mut R</b> | ggggaaagaacatttgatgccatcaaagTGAATTCgattgaaaacaga<br>gtgcttccccgagc | Mutagenesis       |
| <b>Prox Mut F</b>   | gagcgggggcggtggAATTCAggggggaggggca                                 | Mutagenesis       |
| <b>Prox Mut R</b>   | tgccctgccccccTGAATTccaccgccccgctc                                  | Mutagenesis       |

**Supplementary Table III. Gene probes and reporters used in this work.**

| Name            | Description                                  | Structures Detected                            | Type of probe        |
|-----------------|----------------------------------------------|------------------------------------------------|----------------------|
| caMHC           | myosin, heavy chain 7, cardiac muscle        | atrial marker                                  | in situ probe        |
| cNkx2.5         | NK2 homeobox 5                               | Probe for endogenous expression of Nkx2.5      | in situ probe        |
| cPALLD          | palladin, cytoskeletal associated protein    | Probe for endogenous expression of Palladin    | in situ probe        |
| cPrrx1          | paired related homeobox 1                    | Probe for endogenous expression of Prrx1       | in situ probe        |
| cPrrx2          | paired related homeobox 2                    | Probe for endogenous expression of Prrx2       | in situ probe        |
| crestin         | crestin                                      | pan neural crest marker                        | in situ probe        |
| cTbx18          | T-box 18                                     | cardiac posterior pole marker                  | in situ probe        |
| cTbx5           | T-box 5                                      | Probe for endogenous expression of Tbx5        | in situ probe        |
| cvMHC           | myosin, heavy chain 15                       | ventricular marker                             | in situ probe        |
| Islet1          | ISL LIM homeobox 1                           | cardiac posterior pole marker                  | Antibody             |
| MF20            | myosin, heavy chain 1E, skeletal muscle      | cardiomyocyte marker                           | Antibody             |
| mPrrx1          | paired related homeobox 1                    | Probe for endogenous expression of Prrx1       | Antibody             |
| mPrrx2          | paired related homeobox 2                    | Probe for endogenous expression of Prrx2       | in situ probe        |
| Palld           | palladin, cytoskeletal associated protein    | Probe for endogenous expression of Palladin    | Antibody             |
| Prrx1           | paired related homeobox 1                    | Probe for endogenous expression of Prrx1       | Antibody             |
| S46             | myosin, heavy chain 15                       | atrial marker                                  | Antibody             |
| snail1a         | snail family zinc finger 1a                  | Probe for endogenous expression of snail1a     | in situ probe        |
| snail1b         | snail family zinc finger 1b                  | Probe for endogenous expression of snail1b     | in situ probe        |
| zfamhc          | myosin, heavy chain 6, cardiac muscle, alpha | atrial marker                                  | in situ probe        |
| zfltbp3         | latent TGF- $\beta$ binding protein-3        | anterior SHF marker                            | in situ probe        |
| zfmly7          | myosin light-chain 7                         | cardiac myosin marker                          | in situ probe        |
| zfpitx2c        | paired-like homeodomain 2                    | Probe for endogenous expression of pitxc2      | in situ probe        |
| zfprrx1a        | paired related homeobox 1a                   | Probe for endogenous expression of prrx1a      | in situ probe        |
| zfvmyc          | ventricular myosin heavy chain               | ventricular marker                             | in situ probe        |
|                 |                                              |                                                |                      |
| Kaede           | photoactivable fluorescent protein           | Photoactivable reporter for cell tracing       | Fluorescent Protein  |
| LifeAct         | 17-amino-acid peptide fusion to GFP or RFP   | Reporter for filamentous actin, stress fibers  | Fluorescent Probe    |
| Phalloidin      | phalloxin                                    | Reporter for polymeric F actin, stress fibers  | Fluorescent Probe    |
| tdTomato        | tandem dimer Tomato                          | Reporter for CRE driven recombination in mouse | Fluorescent Reporter |
| tbx5a:eGFP      | T-box 5a                                     | Reporter for endogenous expression of Tbx5a    | Fluorescent Reporter |
| Myl12.1-mCherry | myosin, light chain 12, genome duplicate 1   | Reporter for non-cardiac myosin II             | Fluorescent Reporter |

**Supplementary Table IV. Abbreviations used in this work**

| <b>Abbreviation</b> | <b>Full Name</b>                    |
|---------------------|-------------------------------------|
| A                   | atrium                              |
| AIP                 | anterior intestinal portal          |
| CF                  | cardiac folds                       |
| C                   | coelom                              |
| DSpLM               | dorsal splanchnic lateral mesoderm  |
| E                   | eyes                                |
| EC                  | ectoderm                            |
| FG                  | foregut                             |
| HT                  | heart tube                          |
| IFT                 | inflow tract                        |
| LPM                 | lateral plate mesoderm              |
| LSH                 | left sinus venosus horn             |
| LVV                 | left vitelline vein                 |
| NC                  | neural crest                        |
| N                   | notochord                           |
| NP                  | neural plate                        |
| NT                  | neural tube                         |
| OFT                 | outflow tract                       |
| P                   | pericardium                         |
| PHT                 | primary heart tube                  |
| PLPM                | posterior lateral plate mesoderm    |
| PP                  | posterior pole                      |
| PV                  | pericardial vesicle                 |
| RSH                 | right sinus venosus horn            |
| RVV                 | right vitelline vein                |
| S                   | somite                              |
| SHF                 | secondary heart field               |
| SH                  | sinus venosus horns                 |
| SoLM                | somatic lateral mesoderm            |
| SpLM                | splanchnic lateral mesoderm         |
| SV                  | sinus venosus                       |
| V                   | ventricle                           |
| VP                  | venous pole                         |
| VSpLM               | ventral splanchnic lateral mesoderm |
| VV                  | vitelline veins                     |
| YS                  | yolk sac                            |
